# Supplementary material for: On single-electron magnesium bonding formation and the effect of methyl substitution
Source: Royal Society of Chemistry journal article supplement (doi:10.1039/d0ra06591a), 2020-01-01
Supplement: d0ra06591a1.pdf [file d0ra06591a1.pdf]

Supporting Information for

**On single-electron magnesium bonding formation and the effect of methyl substitution**

Dan Yu,<sup>a</sup> Di Wu,<sup>a</sup> Jing-Yao Liu,<sup>a</sup> Si-Yi Li<sup>b</sup> and Ying Li<sup>a\*</sup>

<sup>[1]</sup>*Institute of Theoretical Chemistry, Jilin University, Changchun 130023, P. R. China*

*E-mail: liyingedu@jlu.edu.cn*

<sup>[2]</sup>*Department of Transdisciplinary Science and Engineering, Tokyo Institute of Technology, 2-12-1 Ookayama, Meguro, Tokyo 152-8551, Japan*

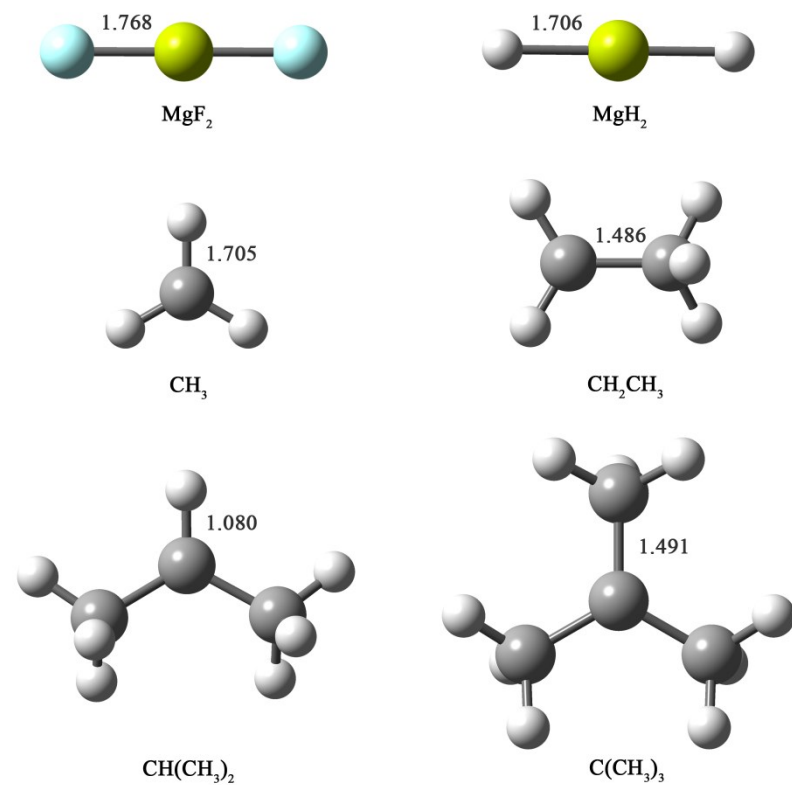

**Figure S1.** The optimized geometries of the  $\text{MgX}_2$  ( $X = \text{F}, \text{H}$ ) molecules and  $\text{CH}_3$ ,  $\text{CH}_2\text{CH}_3$ ,  $\text{CH}(\text{CH}_3)_2$  and  $\text{C}(\text{CH}_3)_3$  radicals at the MP2/aug-cc-pVTZ level.

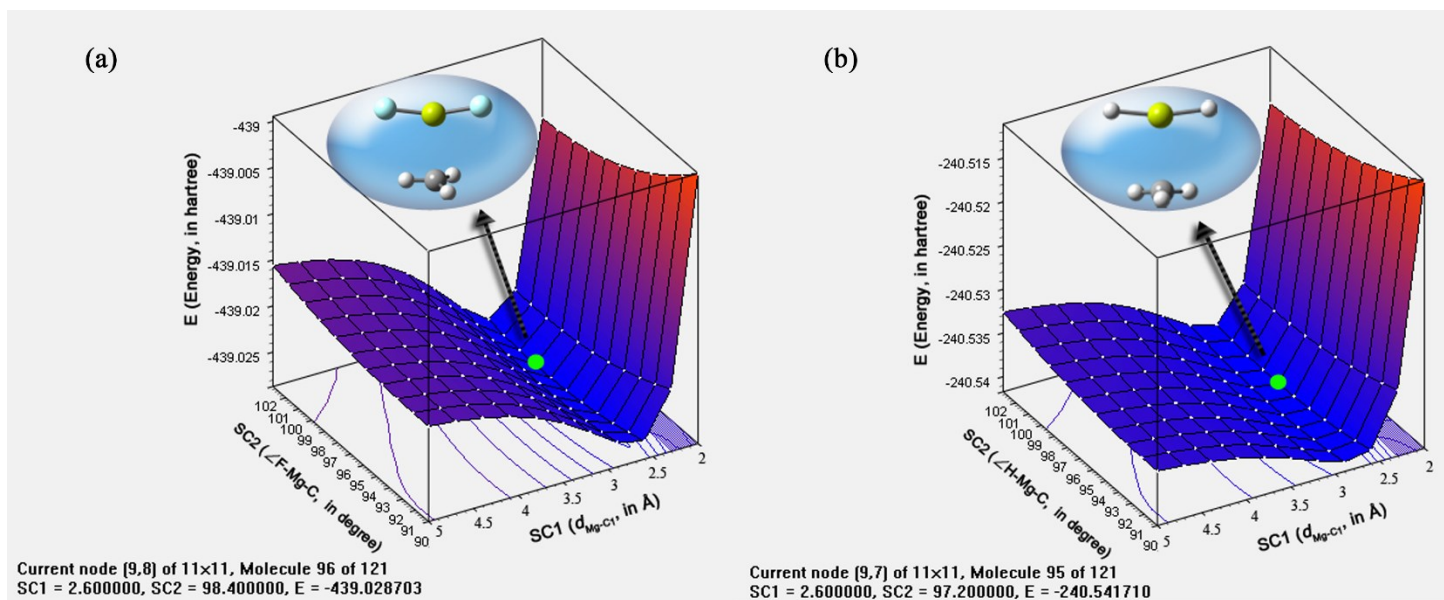

Fig S2. (a) Potential energy scan for **I**, (b) Potential energy scan for **I'**. SC1 and SC2 represent the distance between Mg and C atoms and the X-Mg-C (X = F, H) angle, respectively. Distances in Å and angles in degrees.

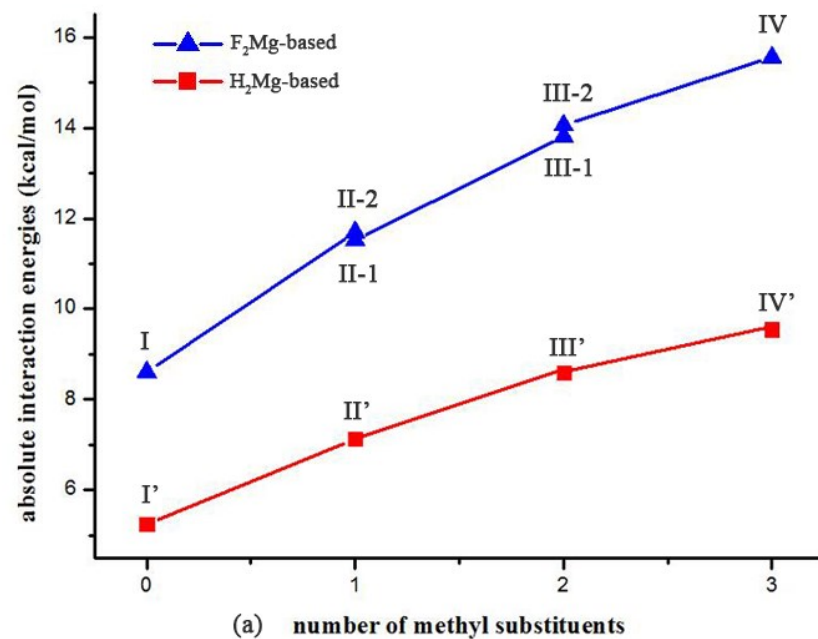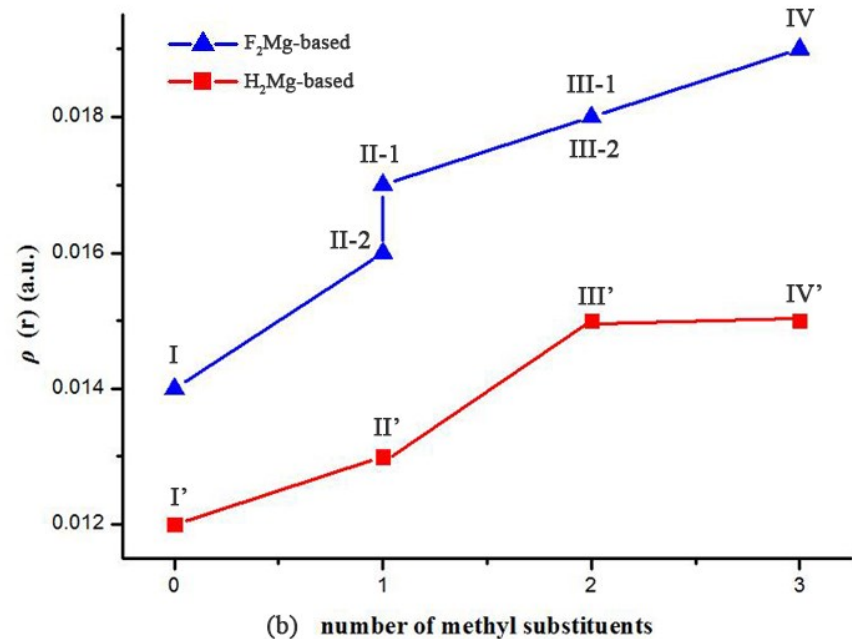

**Fig. S3** (a) The relationship between interaction energy and the number of methyl substituents, (b) the relationship between electron density ( $\rho$ ) at the Mg...C1 BCP and the number of methyl substituents of the X<sub>2</sub>Mg...Y [X = F, H; Y = CH<sub>3</sub>, CH<sub>2</sub>CH<sub>3</sub>, CH(CH<sub>3</sub>)<sub>2</sub>, C(CH<sub>3</sub>)<sub>3</sub>] complexes.

**Table S1** The symmetry, distance between Mg and C1 atoms ( $d_{\text{Mg-C1}}$ , in Å), X-Mg-X angle ( $\alpha$ , in degree), Mg-X1/X2 bond length ( $R_{\text{Mg-X1}}$ , in Å), and the  $D_{\text{X1-Mg-C1-H1}}$  dihedral angle (in degree) of the  $\text{X}_2\text{Mg}\cdots\text{Y}$  [X = F, H; Y =  $\text{CH}_3$ ,  $\text{CH}_2\text{CH}_3$ ] complexes obtained by using different methods with the same aug-cc-pVTZ basis set.

| Complex     | Method       | Symmetry | $d_{\text{Mg-C1}}$ | $\alpha$ | $R_{\text{Mg-X1}}$ | $R_{\text{Mg-X2}}$ | $D_{\text{X1-Mg-C1-H1}}$ |
|-------------|--------------|----------|--------------------|----------|--------------------|--------------------|--------------------------|
| <b>I</b>    | MP2          | $C_s$    | 2.573              | 163.0    | 1.778              | 1.779              | 0.0                      |
|             | wB97XD       | $C_s$    | 2.527              | 164.9    | 1.767              | 1.768              | 0.0                      |
|             | M06-2X       | $C_s$    | 2.506              | 165.1    | 1.752              | 1.754              | 0.0                      |
|             | B3LPY-D3(BJ) | $C_s$    | 2.514              | 162.2    | 1.767              | 1.768              | 0.0                      |
|             | B2PLYPD3     | $C_s$    | 2.525              | 162.5    | 1.768              | 1.769              | 0.0                      |
| <b>II-1</b> | MP2          | $C_s$    | 2.509              | 160.1    | 1.781              | 1.781              | 32.2                     |
|             | wB97XD       | $C_s$    | 2.475              | 161.5    | 1.770              | 1.770              | 32.0                     |
|             | M06-2X       | $C_s$    | 2.443              | 161.5    | 1.756              | 1.756              | 30.2                     |
|             | B3LPY-D3(BJ) | $C_s$    | 2.458              | 158.6    | 1.770              | 1.770              | 32.2                     |
|             | B2PLYPD3     | $C_s$    | 2.466              | 159.3    | 1.771              | 1.771              | 32.1                     |
| <b>II-2</b> | MP2          | $C_I$    | 2.521              | 160.1    | 1.780              | 1.783              | 12.3                     |
|             | B3LPY-D3(BJ) | $C_I$    | 2.465              | 158.3    | 1.769              | 1.772              | 6.0                      |
|             | B2PLYPD3     | $C_I$    | 2.473              | 159.0    | 1.771              | 1.773              | 8.8                      |
| <b>I'</b>   | MP2          | $C_s$    | 2.707              | 166.6    | 1.717              | 1.717              | 89.9                     |
|             | wB97XD       | $C_s$    | 2.590              | 165.4    | 1.719              | 1.719              | 89.9                     |
|             | M06-2X       | $C_s$    | 2.608              | 165.2    | 1.704              | 1.704              | 89.8                     |
|             | B3LPY-D3(BJ) | $C_s$    | 2.551              | 162.8    | 1.716              | 1.716              | 89.9                     |
|             | B2PLYPD3     | $C_s$    | 2.629              | 165.1    | 1.712              | 1.712              | 89.9                     |
| <b>II'</b>  | MP2          | $C_s$    | 2.644              | 164.3    | 1.719              | 1.719              | 31.8                     |
|             | wB97XD       | $C_s$    | 2.583              | 163.3    | 1.719              | 1.719              | 31.9                     |
|             | M06-2X       | $C_s$    | 2.579              | 163.4    | 1.706              | 1.706              | 31.8                     |
|             | B3LPY-D3(BJ) | $C_s$    | 2.581              | 161.7    | 1.715              | 1.715              | 32.1                     |
|             | B2PLYPD3     | $C_s$    | 2.607              | 162.9    | 1.713              | 1.713              | 32.0                     |
